# Supplementary material
Source: bioRxiv or medRxiv preprint supplement (https://www.biorxiv.org/highwire/filestream/107859/field_highwire_adjunct_files/2/354837-3.pdf)

**a**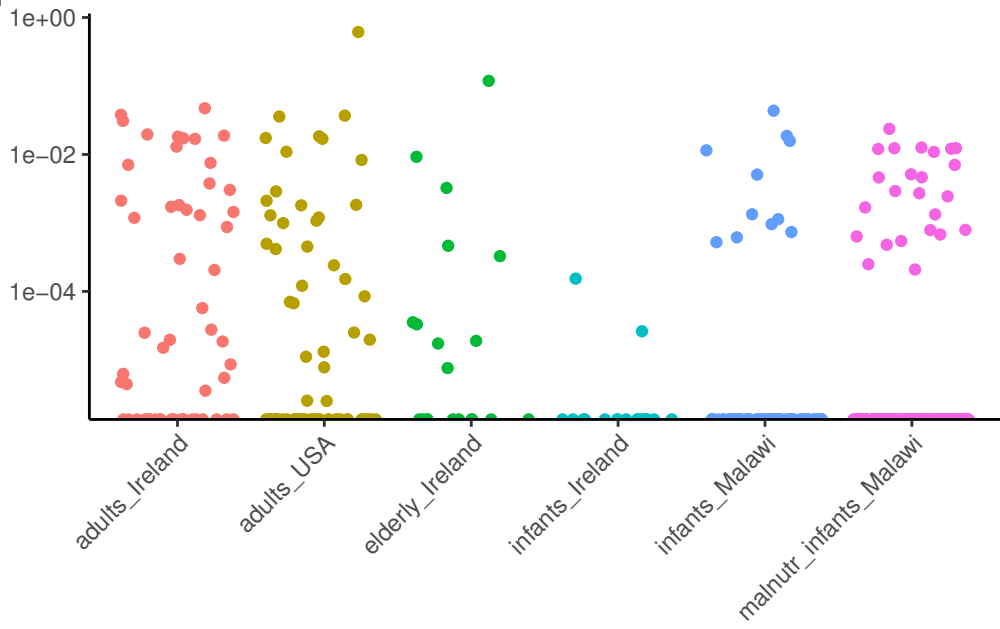**b**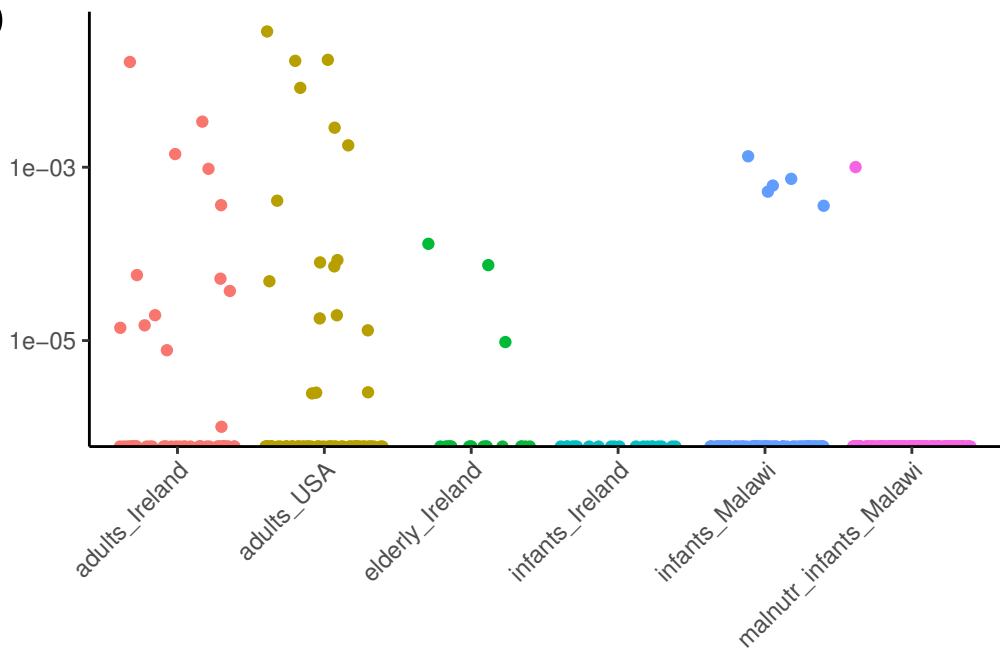

Supplement: Supplementary file [file 354837-3.pdf]
